# Supplementary material for: Auger electron angular distributions following excitation or ionization from the Xe 3d and F 1s levels in xenon difluoride
Source: Royal Society of Chemistry journal article supplement (doi:10.1039/d1cp04797c), 2021-12-24
Supplement: d1cp04797c1.pdf [file d1cp04797c1.pdf]

## Electronic Supplementary Information

### Auger electron angular distributions following excitation or ionization from the Xe 3d and F 1s levels in xenon difluoride

Ruaridh Forbes,<sup>a</sup> Paul Hockett,<sup>b</sup> Ivan Powis,<sup>c</sup> John D. Bozek,<sup>d</sup> Stephen T. Pratt<sup>e</sup> and David M.P. Holland<sup>f</sup>

<sup>a</sup> PULSE Institute, SLAC National Accelerator Laboratory, 2575 Sand Hill Road, Menlo Park, CA 94025 USA

<sup>b</sup> National Research Council of Canada, 100 Sussex Dr. Ottawa, ON K1A 0R6, Canada

<sup>c</sup> School of Chemistry, University of Nottingham, Nottingham NG7 2RD, United Kingdom

<sup>d</sup> Synchrotron SOLEIL, l'Orme des Merisiers, Saint-Aubin, BP 48, 91192 Gif-sur-Yvette, France

<sup>e</sup> Chemical Sciences and Engineering Division, Argonne National Laboratory, Lemont, IL 60439, USA

<sup>f</sup> Daresbury Laboratory, Daresbury, Warrington, Cheshire WA4 4AD, United Kingdom

Table S1

Calculated ionization energies<sup>(a)</sup> and population<sup>(b)</sup> of XeF<sub>2</sub> orbitals.

| Orbital Labelling |              | Ionization energy (eV) <sup>(a)</sup> | Atomic contribution to molecular orbitals <sup>(b)</sup> |       |       |       |       |       |      |       |       |
|-------------------|--------------|---------------------------------------|----------------------------------------------------------|-------|-------|-------|-------|-------|------|-------|-------|
| Atomic            | Molecular    |                                       | Xe 3d                                                    | Xe 4s | Xe 4p | Xe 4d | Xe 5s | Xe 5p | F 1s | F 2s  | F 2p  |
| Xe 3d             | $\sigma_g$   | 715.84                                | 1.0                                                      |       |       |       |       |       |      |       |       |
|                   | $\pi_g$      | 715.75                                | 1.0                                                      |       |       |       |       |       |      |       |       |
|                   | $\delta_g$   | 715.49                                | 1.0                                                      |       |       |       |       |       |      |       |       |
| F 1s              | $\sigma_g$   | 714.39                                |                                                          |       |       |       |       |       | 1.0  |       |       |
|                   | $\sigma_u$   | 714.39                                |                                                          |       |       |       |       |       | 1.0  |       |       |
| Xe 4s             | $\sigma_g$   | 217.94                                |                                                          | 1.0   |       |       |       |       |      |       |       |
| Xe 4p             | $\sigma_u$   | 168.09                                |                                                          |       | 1.0   |       |       |       |      |       |       |
|                   | $\pi_u$      | 167.50                                |                                                          |       | 1.0   |       |       |       |      |       |       |
| Xe 4d             | $\sigma_g$   | 80.27                                 |                                                          |       |       | 1.0   |       |       |      |       |       |
|                   | $\pi_g$      | 79.95                                 |                                                          |       |       | 1.0   |       |       |      |       |       |
|                   | $\delta_g$   | 79.28                                 |                                                          |       |       | 1.0   |       |       |      |       |       |
| Valence Orbitals  |              |                                       |                                                          |       |       |       |       |       |      |       |       |
|                   | $8\sigma_g$  | 42.616                                |                                                          |       |       |       |       |       |      | 0.925 |       |
|                   | $5\sigma_u$  | 42.445                                |                                                          |       |       |       |       |       |      | 0.966 |       |
|                   | $9\sigma_g$  | 29.535                                |                                                          |       |       |       | 0.855 |       |      |       |       |
|                   | $6\sigma_u$  | 20.109                                |                                                          |       |       |       |       | 0.249 |      |       | 0.714 |
|                   | $4\pi_u$     | 18.369                                |                                                          |       |       |       |       | 0.246 |      |       | 0.745 |
|                   | $3\pi_g$     | 17.511                                |                                                          |       |       |       |       |       |      |       | 0.972 |
|                   | $10\sigma_g$ | 15.038                                |                                                          |       |       |       |       |       |      |       | 0.836 |
|                   | $5\pi_u$     | 13.539                                |                                                          |       |       |       |       | 0.761 |      |       | 0.235 |

<sup>(a)</sup> Koopmans Theorem values: RHF/DGVDZP calculation for core levels; RHF/def2-QZVP (with ECP) for valence orbitals<sup>(b)</sup> Mulliken population analysis: MP2/DGVPDZ calculation for core levels; MP2/def2-QZVP for valence orbitals. F atom contributions are shown as the sum of the two equivalent individual F atom populations.

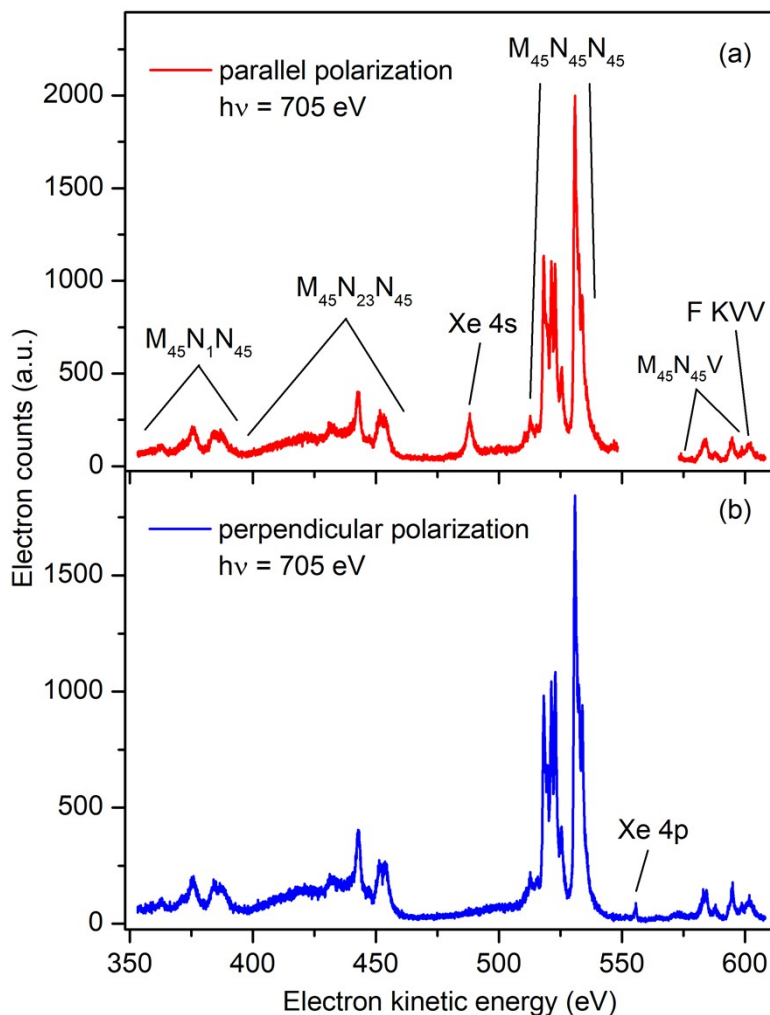

Figure S1

The non-resonant Auger electron spectrum of XeF<sub>2</sub> recorded at a photon energy of 705 eV using parallel (a) and perpendicularly (b) polarized radiation. Most of the structure is associated with the M<sub>45</sub>N<sub>1</sub>N<sub>45</sub>, M<sub>45</sub>N<sub>23</sub>N<sub>45</sub>, M<sub>45</sub>N<sub>45</sub>N<sub>45</sub>, and M<sub>45</sub>N<sub>45</sub>V transitions, although one peak is attributed to the F KVV transition. Peaks arising from direct ionization from the Xe 4s and Xe 4p levels are observed in the spectra recorded with parallel (a) and perpendicularly (b) polarized radiation, respectively.

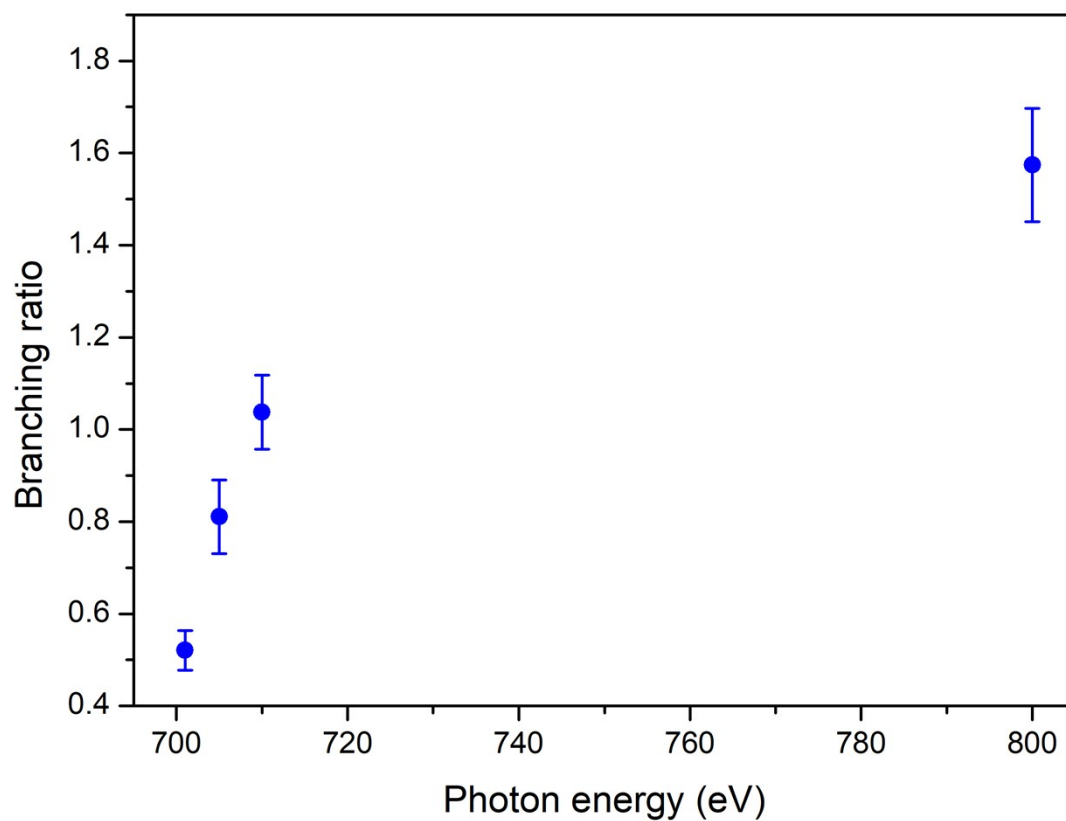

Figure S2

The  $M_4N_{45}N_{45}:M_5N_{45}N_{45}$  intensity branching ratio obtained from the fits of the non-resonant Auger spectra.

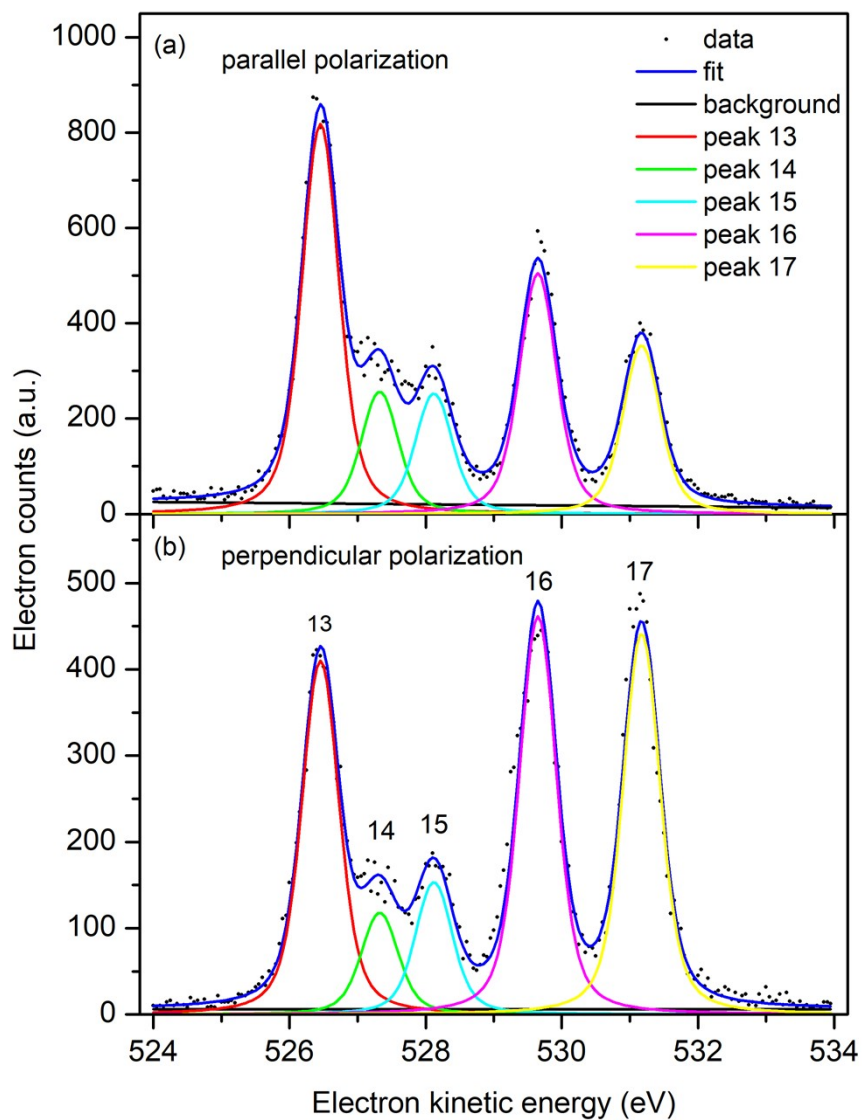

Figure S3

Resonantly excited  $M_5N_{45}N_{45}$  Auger spectra, measured at a photon energy of 669.9 eV, coinciding with the  $Xe\ 3d_{5/2} \rightarrow \sigma^*$  transition. The spectra were recorded with parallel (a) and perpendicularly (b) polarized radiation. The raw and the fitted data are shown. The kinetic energies of the peaks numbered 13-17 are given in Table 2.

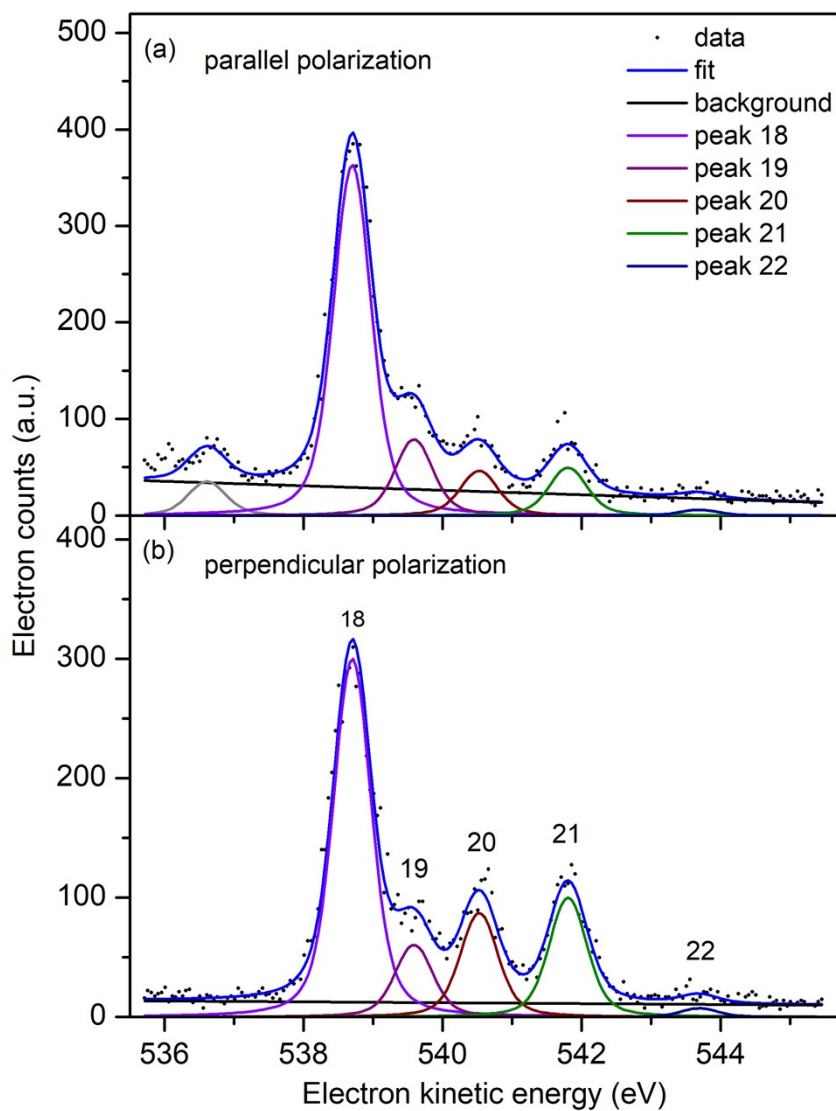

Figure S4

Resonantly excited  $M_4N_{45}N_{45}$  Auger spectra, measured at a photon energy of 682.8 eV, coinciding with the overlapping Xe  $3d_{3/2} \rightarrow \sigma^*$  and F  $1s \rightarrow \sigma^*$  transitions. The spectra were recorded with parallel (a) and perpendicularly (b) polarized radiation. The raw and the fitted data are shown. The kinetic energies of the peaks numbered 18-22 are given in Table 2.
